# Supplementary material
Source: HighWire-hosted journal article supplement (https://www.cmajopen.ca/highwire/filestream/84478/field_highwire_adjunct_files/2/2019-0057-3-at.pdf)
Supplement: 2019-0057-3-at.pdf [file 2019-0057-3-at.pdf]

## Appendix 3 (as supplied by the authors): One-way sensitivity analyses and scenario analysis

|                                                              |           |          |          |          |           |
|--------------------------------------------------------------|-----------|----------|----------|----------|-----------|
| Community follow-up cost ↓50%                                |           |          |          |          |           |
|                                                              | COST (\$) | Δ cost   | QALYs    | ΔQALYs   | ICER      |
| WW                                                           | 588.0376  |          | 32.33195 |          | -         |
| S&T                                                          | 254.9102  | -333.127 | 32.48043 | 0.148478 | Dominates |
| PT                                                           | 176.5987  | -78.3115 | 32.49497 | 0.014541 | Dominates |
| Probability disease progression ↓50%                         |           |          |          |          |           |
|                                                              | COST (\$) | Δ cost   | QALYs    | ΔQALYs   | ICER      |
| WW                                                           | 244.1808  |          | 32.45116 |          | -         |
| S&T                                                          | 152.5585  | -91.6223 | 32.52085 | 0.069686 | Dominates |
| PT                                                           | 97.8716   | -54.6869 | 32.52767 | 0.006825 | Dominates |
| Mean years to symptom onset doubled                          |           |          |          |          |           |
|                                                              | COST (\$) | Δ cost   | QALYs    | ΔQALYs   | ICER      |
| WW                                                           | 590.0091  |          | 32.35042 |          | -         |
| S&T                                                          | 255.1248  | -334.884 | 32.49393 | 0.14351  | Dominates |
| PT                                                           | 176.3028  | -78.8219 | 32.50798 | 0.014055 | Dominates |
| Treatment failure rate doubled                               |           |          |          |          |           |
|                                                              | COST (\$) | Δ cost   | QALYs    | ΔQALYs   | ICER      |
| WW                                                           | 586.6606  |          | 32.35014 |          | -         |
| S&T                                                          | 310.8481  | -275.813 | 32.47609 | 0.125958 | Dominates |
| PT                                                           | 237.8762  | -72.9719 | 32.48843 | 0.012336 | Dominates |
| Treatment adherence 50%                                      |           |          |          |          |           |
|                                                              | COST (\$) | Δ cost   | QALYs    | ΔQALYs   | ICER      |
| WW                                                           | 589.3176  |          | 32.3468  |          | -         |
| S&T                                                          | 428.7695  | -160.548 | 32.42936 | 0.08256  | Dominates |
| PT                                                           | 355.0411  | -73.7284 | 32.43744 | 0.008086 | Dominates |
| Empiric treatment adherence 15% less than with positive test |           |          |          |          |           |
|                                                              | COST (\$) | Δ cost   | QALYs    | ΔQALYs   | ICER      |
| WW                                                           | 595.7445  |          | 32.33644 |          | -         |
| S&T                                                          | 256.2383  | -339.506 | 32.48723 | 0.15079  | Dominates |
| PT                                                           | 100.5738  | -155.664 | 32.53031 | 0.043078 | Dominates |
| ALL OF THE ABOVE TRUE                                        |           |          |          |          |           |
|                                                              | COST (\$) | Δ cost   | QALYs    | ΔQALYs   | ICER      |
| WW                                                           | 241.6268  |          | 32.45834 |          | -         |
| S&T                                                          | 232.0691  | -9.55776 | 32.49207 | 0.033736 | Dominates |
| PT                                                           | 147.3703  | -84.6988 | 32.5065  | 0.014431 | Dominates |
